1 **p53 is required for female germline stem cell maintenance in *P*-element**  
2 **hybrid dysgenesis.**

3

4 Sadia Tasnim<sup>\*†</sup> & Erin S. Kelleher<sup>†‡</sup>

5

6

7

---

\* Department of Biochemistry and Molecular Biology, Institute for Translational  
The University of Texas Medical Branch, Galveston, TX 77555

† Department of Biology and Biochemistry, University of Houston, Houston, TX  
77204

‡ To whom correspondence should be addressed, [eskelleher@uh.edu](mailto:eskelleher@uh.edu)

1 **ABSTRACT**

2

3 Hybrid dysgenesis is a sterility syndrome resulting from the mobilization of certain  
4 transposable elements in the *Drosophila* germline. Particularly extreme is the hybrid  
5 dysgenesis syndrome caused by *P*-element DNA transposons, in which dysgenic  
6 female ovaries often contain few or no germline cells. Those offspring that are  
7 produced from dysgenic germlines exhibit high rates of *de novo* mutation and  
8 recombination, implicating transposition-associated DNA damage as the cause of  
9 germline loss. However, how this loss occurs, in terms of the particular cellular  
10 response that is triggered (cell cycle arrest, senescence, or cell death) remains  
11 poorly understood. We demonstrate that two components of the DNA damage  
12 response, Checkpoint kinase 2 and its downstream target p53, are determine the  
13 frequency of ovarian atrophy that is associated with *P*-element hybrid dysgenesis.  
14 We further show that p53 is strongly induced in the germline stem cells (GSCs) of  
15 dysgenic females, and is required for their maintenance. Our observations support  
16 the critical role for p53 in conferring tolerance of transposable element activity in  
17 stem cells.

18

## 1 INTRODUCTION

2

3 Transposable elements (TEs) are mobile genetic parasites that ensure their  
4 spread through host populations by replicating in germline cells. This selfish  
5 replication not only harms the host by producing deleterious mutations that are  
6 transmitted to offspring (Dupuy et al., 2001; Spradling et al., 1999), it can also  
7 decrease host fertility by disrupting gametogenesis (Josefsson et al., 2006; Orsi et al.,  
8 2010; Schaefer et al., 1979). This is particularly clear with hybrid dysgenesis, a  
9 sterility syndrome of *Drosophila* caused by the unregulated transposition of certain  
10 TE families in germline cells (Bingham et al., 1982; Bucheton et al., 1984; Evgen'ev  
11 et al., 1997; Hill et al., 2016; Rubin et al., 1982; Yannopoulos et al., 1987). The hybrid  
12 dysgenesis syndrome imposed by *P*-element DNA transposons is particularly  
13 dramatic, causing females to have small atrophied ovaries that contain few or no  
14 germline cells (Dorogova et al., 2017; Schaefer et al., 1979). While the DNA damage  
15 associated with *P*-element transposition is thought to precipitate germline loss  
16 (Khurana et al., 2011), the cellular mechanisms that are responsible remain poorly  
17 understood (Dorogova et al., 2017; reviewed in Malone et al., 2015).

18 The DNA damage response (DDR) is a network of cellular pathways that  
19 detects and integrates DNA damage signals and determines cellular responses. In  
20 the *Drosophila* female germline, DNA damage is known to induce both cell-cycle  
21 arrest and apoptosis (Hassel et al., 2013; Shim et al., 2014), which could explain the  
22 absence of developing egg chambers in the presence of rampant transposition. In  
23 particular, the DDR inducer Checkpoint kinase 2 (Chk2) and its downstream effector

1 p53 play key roles in determining the fate of damaged germline genomes. In early  
2 oogenesis, among germline stem cells (GSCs) and their mitotically-dividing daughter  
3 cystoblasts (CBs), these proteins have opposing functions. *mnk/loki*, which encodes  
4 Chk2, is required to trigger cell cycle arrest in response to DNA damage, while *p53* is  
5 required to ensure cell-cycle re-entry (Ma et al., 2017; Shim et al., 2014; Wylie et al.,  
6 2014). By contrast, in early meiotic cells, *p53* acts downstream of *mnk/loki* to trigger  
7 apoptosis (Shim et al., 2014). Chk2 activation can also induce meiotic arrest in  
8 response to unrepaired double stranded breaks in a *p53*-independent manner  
9 (Abdu et al., 2002).

10         Although DDR has not been directly linked to dysgenic ovarian atrophy, two  
11 lines of evidence implicate it as a cause of germline loss. First, when sterility is  
12 incomplete, egg chambers produced by *P*-element dysgenic females often show  
13 morphological defects associated with Chk2-induced meiotic arrest (Khurana et al.,  
14 2011). Second, increased cell-death is observed in the early meiotic stages of  
15 dysgenic female germlines (Dorogova et al., 2017), the precise developmental time-  
16 point at which *mnk/loki* and *p53*-dependent apoptosis is known to result from DNA  
17 damage (Hassel et al., 2013; Shim et al., 2014).

18         In this study, we directly interrogate the role of the DDR inducers Chk1 and  
19 Chk2, and their downstream effector p53, in producing dysgenic ovarian atrophy.  
20 We demonstrate that *mnk/loki* and *p53* are strong genetic modifiers of hybrid  
21 dysgenesis, consistent with their roles in determining cellular response to DNA  
22 damage. We further reveal that p53 is induced in dysgenic GSCs and CBs, and is  
23 required for GSC maintenance in the dysgenic germline. Our results implicate DDR

1 as a key determinant germline cell fate in the presence of *P*-element activity, and  
2 highlight the role of p53 in conferring GSC tolerance of DNA damage.

3

#### 4 **MATERIALS and METHODS**

5

6 ***Drosophila stocks.*** *p53[5A-1-4]*, *p53[11-1B-1]* (Rong et al., 2002) and Harwich  
7 (Kidwell et al., 1977) were obtained from the Bloomington stock center. *grp[209]*,  
8 *grp[Z5170]*, and *loki[30]* were generously provided by Jeff Sekelsky (LaRocque et al.,  
9 2007). *mnk[6006]* was generously provided by Bill Theurkauf. Canton-S was  
10 generously provided by Richard Meisel. *ep(2)1024/cyo;Hsp70-Gal4* was generously  
11 provided by Haifan Lin (Cox et al., 2000). Two p53 biosensors, *rpr-GFP-cyt* and *rpr-*  
12 *GFP-nuc*, were generously provided by John Abrams.

13 To extract the loss of function mutations into a Harwich genetic background,  
14 we first extracted 2<sup>nd</sup> (*Cyo*) or 3<sup>rd</sup> (*TM6*) balancer chromosomes into Harwich by  
15 crossing Harwich females to the multiply marked stock *w\**; *Sp/Cyo; sens[Ly-1]/TM6*  
16 *Sb Tb* (Bloomington Stock number 42294), and selecting for balancer (*Cyo/+;*  
17 *TM6/+*) males, which were backcrossed to Harwich. The resulting marked stock was  
18 used for extraction of loss of function chromosomes. The final genotypes were:  
19 *H;loki[30]/Cyo;H, H;grp[209]/Cyo;H, H;grp[Z5170]/Cyo;H, H;H; p53[5A-1-4]/TM3 or*  
20 *TM6, and H;H; p53[11-1B-1]/TM3 or TM6*, where H indicates a Harwich  
21 chromosome. We did not extract the *mnk[6006]* allele into the Harwich background,  
22 because this allele is caused by a *P*-element insertion (Brodsky et al., 2004), and

1 could therefore be unstable in the presence of P-transposase encoded by Harwich  
2 chromosomes.

3 **Crosses.** To evaluate the effects of DDR loss-of-function mutations on dysgenic  
4 ovarian atrophy we compared F1 offspring of crosses between M strain females that  
5 lack *P*-elements or maternally transmitted *P*-element regulation, and P strain males  
6 that contain active genomic *P*-elements that can induce hybrid dysgenesis (reviewed  
7 in Kelleher, 2016). To detect dominant effects, we crossed heterozygous females  
8 (DDR mutant/balancer, M background) to Harwich males. To evaluate the recessive  
9 effects we crossed heterozygous females (DDR mutant/balancer, M background) in  
10 to heterozygous (DDR mutant/balancer) Harwich (P) males. These crosses were  
11 performed and offspring were reared at 25°C, as we have previously observed that  
12 this temperature is optimal for revealing variation in the severity of dysgenesis  
13 (Srivastav and Kelleher, 2017).

14 To evaluate the effect of Piwi overexpression in somatic tissues,  
15 *ep(2)1024/cyo;Hsp70-Gal4* were crossed to Harwich and Canton-S males at 25°C. F1  
16 female offspring were reared at 25°C, but exposed to a 1hr heat-shock (37°C) every  
17 12 hours for 3 days (Cox et al., 2000).

18

19 **Ovarian atrophy.** 3-6 day-old female offspring were squashed under a coverslip  
20 with food-dye, to detect the presence of stage 14 egg chambers (Srivastav and  
21 Kelleher, 2017).

22

1 **Immunolabelling.** Ovaries were dissected from 3-6 day-old female offspring, and  
2 prepared according to the method of McKearin and Ohlstein (1995). Primary  
3 antibody concentrations were as follows: anti-GFP 1:1000, anti-Hts 1B1 1:4 (DSHB,  
4 Zaccai and Lipshitz, 1996), anti-Vasa 1:40. Secondary antibody concentrations were  
5 1:500.

6  
7 **Microscopy.** Ovaries were visualized with a SP8 Upright Confocal DM6000 CFS  
8 (Leica) Microscope outfitted with a 60X oil immersion lens. Images were gathered  
9 using an EM-CCD camera (Hamamatsu) and the LAS AF software (Leica).

10

## 11 **RESULTS**

12

13 **Chk2 and p53 are strong modifiers of hybrid dysgenesis.** Dysgenic ovarian  
14 atrophy occurs among F1 offspring of crosses between M strain females who lack  
15 genomic *P*-elements and maternally transmitted *P*-element regulation, and P strain  
16 that carry a large number of active *P*-elements (Bingham et al., 1982; reviewed in  
17 Kelleher, 2016). We first considered the role of the DDR in dysgenic germline loss by  
18 determining whether loss-of-function alleles in DDR components are associated  
19 with an altered frequency of the ovarian atrophy phenotype. In addition to *mnk/loki*  
20 and *p53*, we also examined alleles of *grapes*, which encode the DDR inducer  
21 Checkpoint kinase 1 (Chk1). *grapes* works synergistically with *mnk/loki* in mitotic  
22 arrests in the female germline (Shim et al., 2014).

1 All the mutant alleles we examined were generated and maintained in M  
2 backgrounds (Bellen et al., 2004; Koundakjian et al., 2004; Rong et al., 2002; Rørth,  
3 1996). We therefore looked for dominant effects of DDR alleles by examining the F1  
4 offspring of heterozygous (*mutant/balancer*, M strain) females crossed to males of  
5 the reference P strain Harwich (Kidwell et al., 1977). For two separate alleles of  
6 *grapes*, a single allele of *mnk/loki*, and a single allele of *p53* (*p53[5A-1-4]*) we  
7 detected no dominant effects, as heterozygous F1 offspring (*mutant/+*) did not differ  
8 from their wild-type siblings (*balancer/+*, Figure 1A). A second *p53* allele (*p53[11-*  
9 *1B-1]*) was associated with a marginally significant increase in dysgenic ovarian  
10 atrophy ( $p = 0.06$ ), suggesting it is a mild dominant enhancer of ovarian atrophy.

11 To look for recessive effects, we crossed M strain female heterozygotes  
12 (*mutant/balancer*) to P strain male heterozygotes (*mutant/balancer*), from stocks  
13 we generated by extracting the mutant and balancer chromosomes into the Harwich  
14 background. We observed strong recessive effects of *mnk/loki* alleles on the  
15 frequency of dysgenic ovaria atrophy (Figure 1B). Transheterozygous *mnk/loki*  
16 offspring exhibited a dramatic 80% reduction in their incidence of ovarian atrophy  
17 when compared to their heterozygous (*mutant/balancer*) siblings. *mnk/loki*  
18 homozygotes could not be examined due to low viability (*loki[30]*), or instability of  
19 the causative insertion in the Harwich background (*mnk[6006]*). *grapes* alleles were  
20 weaker repressors than *mnk/loki*, with only one allele (*grp[Z5170]*) showing  
21 significantly reduced atrophy in homozygotes (30%) and transheterozygotes (39%).  
22 In contrast to the *mnk/loki* and *grapes*, homozygous and transheterozygous  
23 combinations of *p53* alleles enhanced ovarian atrophy by 13-22% when compared



1 to heterozygous controls. The relative increase in ovarian atrophy is misleadingly  
2 modest, because it reflects almost complete sterility (99-100%) among dysgenic *p53*  
3 homozygotes and transheterozygotes.

4       Opposing effects of *mnk/loki* and *p53* mutations are consistent with the  
5 action of their gene products in GSCs, in which Chk2 triggers arrest in response to  
6 DNA damage, and *p53* is required for cell-cycle re-entry (Ma et al., 2017; Wylie et al.,  
7 2014). If GSCs are arrested in atrophied ovaries, stimulating GSC division could  
8 restore gametogenesis. Somatic overexpression of *piwi* is known to non-  
9 autonomously stimulate GSC division (Cox et al., 2000). We therefore took  
10 advantage of a UAS-containing EP insertion in the 5' *piwi*-UTR, which drives ectopic  
11 expression only in somatic cells when bound by Gal4 (Cox et al., 2000; Rørth, 1998).  
12 We crossed *ep(2)1024/Cyo;hsGal4* (M) females to Harwich (P) and Canton-S (M)  
13 males, and compared both classes of offspring after three days of heat-shock  
14 treatment. Consistent with GSC arrest, *piwi* overexpression (*ep(2)1024/hsGal4*) was  
15 associated with significantly decreased ovarian atrophy in dysgenic crosses  
16 involving Harwich males, but not in non-dysgenic crosses involving Canton-S males  
17 (Figure 1C). Because the P{*hsGal4*} and EP insertions are unstable in the dysgenic  
18 germline due the presence of *P*-transposase, the mild effect we observed likely  
19 underestimates the full impact of *piwi* overexpression. Taken together, our genetic  
20 analyses strongly implicate DDR in GSCs and CBs as an important determinant of *P*-  
21 element dysgenic ovarian atrophy.

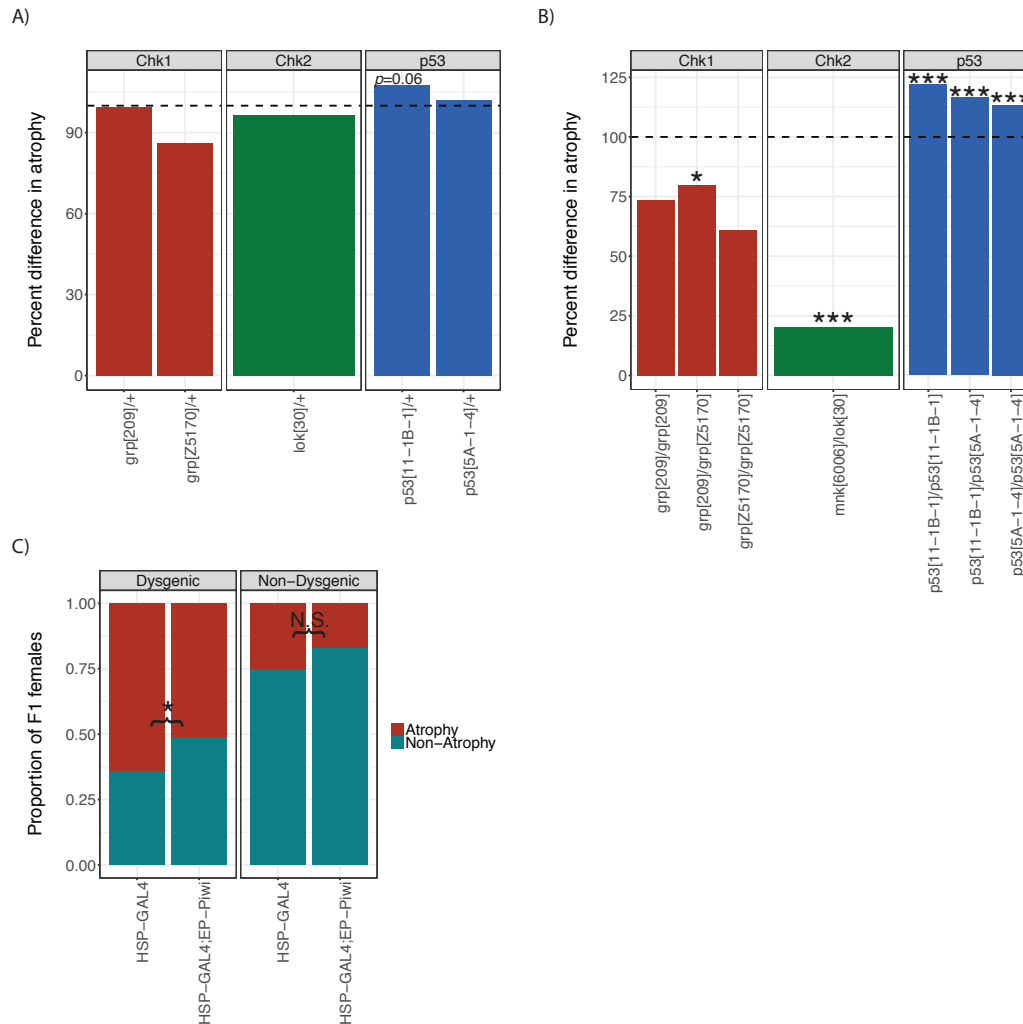

1

2 **Figure 1. DDR components and regulators of GSC division are genetic**

3 **modifiers of hybrid dysgenesis.** The (A) dominant and (B) recessive effects of

4 loss-of-function alleles for *grp*, *lok/mnk*, and *p53* on the incidence of F1 ovarian

5 atrophy are evaluated. For each genotype, the frequency of ovarian atrophy is

6 indicated as a percentage, relative to their homozygous wild type (A) and

7 heterozygous (B) siblings from the same dysgenic cross. C) The proportion of

8 offspring that exhibit ovarian atrophy is compared in the presence and absence of

9 somatic *piwi* overexpression for dysgenic and non-dysgenic crosses. The statistical

10 significance of the effect of each allele or genotype was ascertained by a  $X^2$  or

1 Fisher's exact test, and is indicated by the following notation. \* denotes  $p \geq 0.05$ , \*\*  
2 denotes  $p \geq 0.01$ , \*\*\* denotes  $p \geq 0.001$ , N.S. denotes non-significant.

3

4 **Nuclear p53 is induced in dysgenic GSCs.** p53 plays diverse roles in integrating  
5 DDR signals into cellular responses, both through its canonical role as a  
6 transcriptional regulator, and through interaction with both nuclear and cytoplasmic  
7 co-factors (reviewed in Green and Kroemer, 2009; Kasthuber and Lowe, 2017). In  
8 the *Drosophila* germline, transcriptional activation by nuclear p53 occurs in  
9 response to DNA damage only in GSCs and CBs (Wylie et al., 2014). Given our  
10 observations that p53 is required for oogenesis in dysgenic females (Figure 1B), we  
11 wondered if p53 transcriptional activation is induced in these cells. To address this  
12 question, we took advantage of a previously developed p53 biosensor, in which GFP  
13 expression is controlled by regulatory sequences of the p53 target *reaper* (Lu et al.,  
14 2010). When p53 is present in the nucleus, GFP is produced. To compare p53  
15 transcriptional activation in the presence and absence of *P*-element dysgenesis, we  
16 crossed females bearing two different p53 biosensors, encoding either nuclear or  
17 cytoplasmic GFP, to either Harwich (P) or Canton-S (M) strain males.

18 Consistent with the occurrence of DNA damage, we frequently observed  
19 induction of both biosensors in the GSCs or CBs of F1 females from dysgenic crosses  
20 involving Harwich males, but never in the non-dysgenic crosses involving Canton-S  
21 males (Figure 2A-C). This phenotype was incompletely penetrant, with 48% of F1  
22 dysgenic germaria exhibiting GFP positive cells, as compared to 0% of non-dysgenic  
23 females. Incomplete penetrance of p53 induction could suggest that DNA damage

1 associated with hybrid dysgenesis varies from cell-to-cell, but could also reflect  
2 stochastic excision of the biosensor transgene, which would be unstable in a *P*-  
3 dysgenic germline. Regardless, our observations suggests that p53 transcriptional  
4 regulation is induced by *P*-element activity in mitotically dividing GSCs and CBs,  
5 which is consistent evidence that *P*-elements often transpose in mitotic germline  
6 cells (Engels et al., 1990).

7

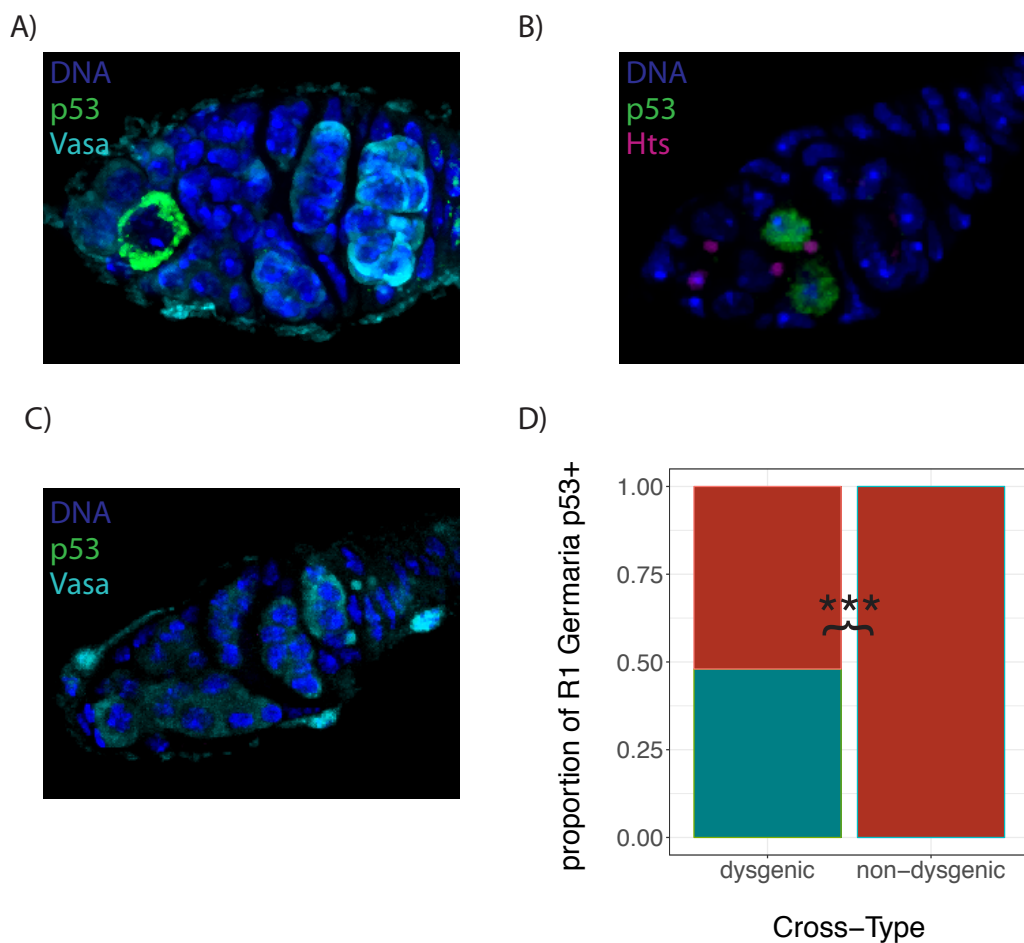

8

9

1 **Figure 2. p53 is induced in dysgenic germaria.** (A and B) Representative images  
2 of *rpr*-GFP expression in GSCs or CBs of dysgenic germaria, the ovarian structure  
3 where GSC reside and mitotic division occur (reviewed in Spradling, 1993). C) *rpr*-  
4 GFP is not induced in non-dysgenic germaria. All germaria are co-stained with DAPI  
5 to visualize nuclei, and either the germline marker Vasa (A and C), or Hts-1B1 (B),  
6 which identifies the circular spectrosomes of GSCs and CBs. D) The frequency of  
7 germaria with GFP positive cells in region 1, where GSCs and CBs occur, is compared  
8 between the dysgenic female offspring of Harwich fathers, and non-dysgenic  
9 offspring of Canton-S fathers. Statistical significance was ascertained by a Fisher's  
10 exact test. \*\*\* denotes  $p \geq 0.001$

11

12 **p53 is required for GSC maintenance in dysgenic germaria.** Finally, we  
13 considered the role of p53 facilitating oogenesis in dysgenic females. We first  
14 examined the gross morphology of F1 female ovaries, to look for evidence of earlier-  
15 stage non-chorionated egg chambers, which would not be detected by the squash  
16 prep we employed for Figure 1. However, consistent with a requirement for *p53* at  
17 the earliest stages of oogenesis, dysgenic *p53* transheterozygotes overwhelmingly  
18 lacked any evidence of female germline development; with 55 of 56 females we  
19 dissected exhibiting two completely atrophied ovaries. (Figure 3A, D) In contrast, 14  
20 out of 21 heterozygous females exhibited germline development in one or both  
21 ovaries (Figure 3B-D).

22

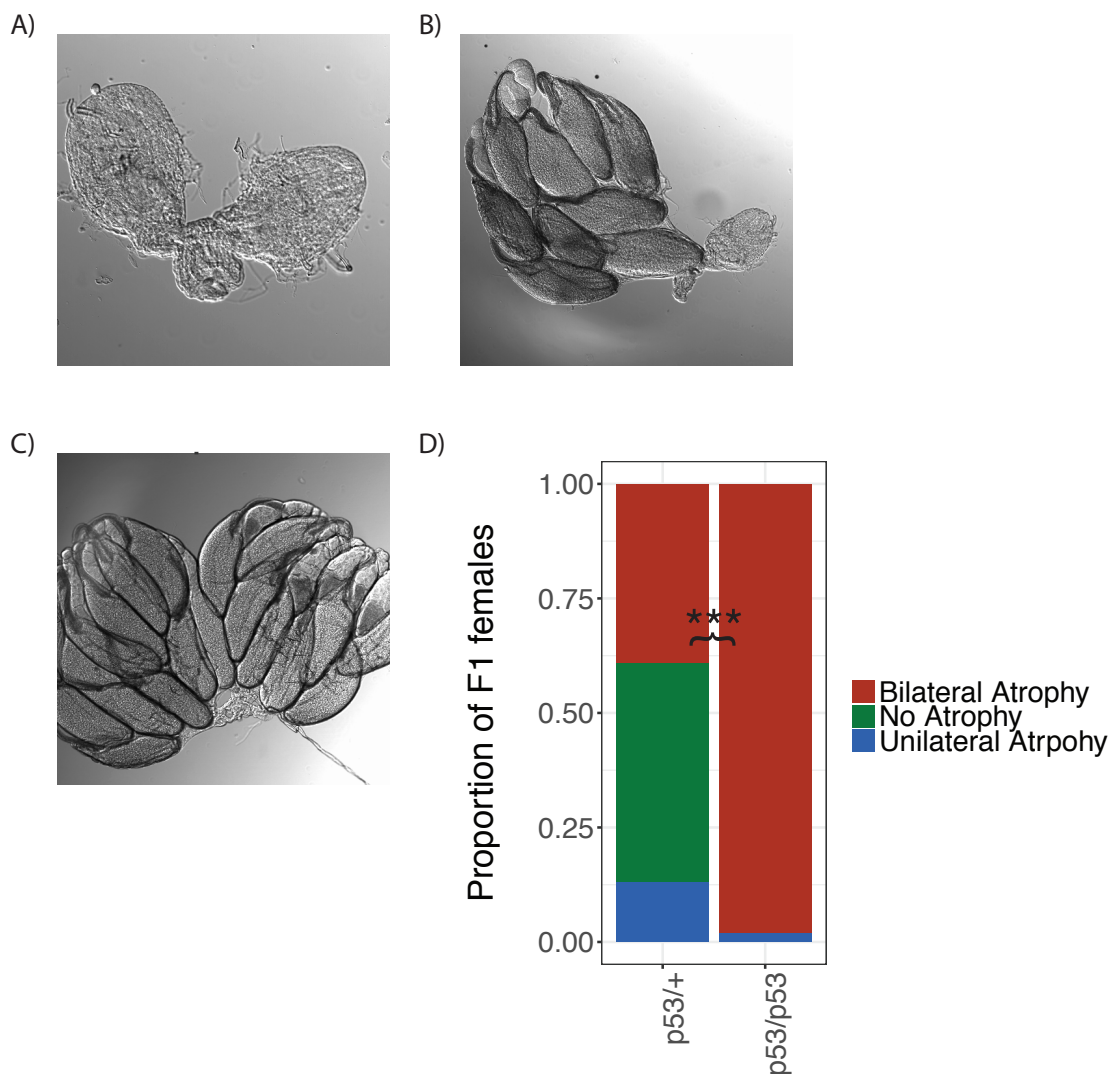

1

2 **Figure 3. p53 mutants exhibit bilateral ovarian atrophy.** Representative images

3 if A) bilateral and B) unilateral ovarian atrophy are presented, as well as pair of

4 non-atrophied ovaries. D) The frequency of ovarian phenotypes is compared

5 between p53 heterozygotes (*p53[5A-1-4]/+*) and transheterozygotes (*p53[5A-1-4]/*

6 *p53[11-1B-1]*). Statistical significance was assessed by a 2x2  $X^2$  test comparing the

7 frequency of bilateral atrophy, to that of unilateral and no-atrophy combined,

8 between the two genotypes. \*\*\* denotes  $p \geq 0.001$

9

1           If *p53* is required only for cell cycle re-entry in damaged GSCs and CBs (Wylie  
2 et al., 2014), then dysgenic *p53* transheterozygotes should exhibit a very early pre-  
3 meiotic arrest in oogenesis. However, a recent study suggests that in mutants that  
4 are defective in TE regulation, *p53* is also required for GSC maintenance (Ma et al.,  
5 2017). Consistent with a role in GSC maintenance, we observed that germline cells,  
6 including GSCs, were almost completely absent from the atrophied ovaries from *p53*  
7 transheterozygous dysgenic females (Figure 4A). By contrast, *p53* heterozygotes  
8 frequently exhibited developing oocytes at all stages, including GSCs (Figure 4C).

9           Although we observed no evidence for normal oogenesis at any stage in the  
10 atrophied ovaries of *p53* transheterozygous dysgenic females, we did encounter a  
11 number of isolated cells that express the germline-specific marker Vasa (Figure 4B).  
12 However, these cells did not exhibit the spectrosome structures that are  
13 characteristic of GSCs or CBs, nor were they found in multicellular cysts that  
14 characterize subsequent stages of oogenesis. The origin of these germline cells is  
15 unclear, but they suggest a disruption in the early oogenesis, in which stem cell  
16 identity is lost, but mitotic divisions and differentiation do not occur.

17

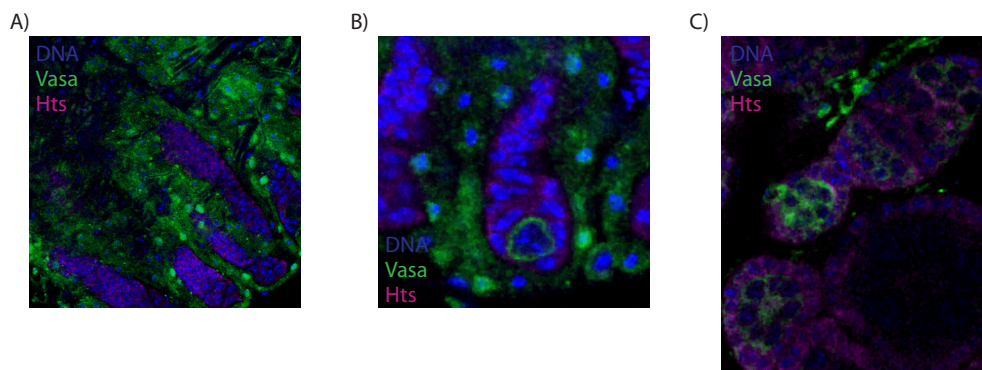

18

1 **Figure 4. Atrophied ovaries of *p53* mutant dysgenic females lack GSCs.**

2 Germaria from transheterozygous and heterozygous *p53* dysgenic females. Vasa,  
3 which is found in germline cells and the ovarian sheath, is shown in green. Hts-1B1,  
4 which is found in circular spectrosomes in GSCs and CBs, as well as somatic cells  
5 that surround the developing egg chamber, is shown in magenta. DAPI-stained DNA  
6 is shown in blue. A) Atrophied ovaries from transheterozygous *p53* dysgenic  
7 females contain empty ovarioles that lack Vasa-positive germline cells. B)  
8 Occasional isolated germline cells, lacking spectrosomes, are found in *p53*  
9 transheterozygous dysgenic ovaries. C) Ovaries of *p53* heterozygotes often exhibit  
10 GSCs and CBs in germaria, as well as developing egg chambers.

11

12 **CONCLUSION**

13

14 Transposable elements impose a significant burden on their host genome, not only  
15 as a cause of deleterious mutations (Dupuy et al., 2001; Spradling et al., 1999), but  
16 also as a source of genotoxic stress (reviewed in Castañeda et al., 2011; Hedges and  
17 Deininger, 2007). As arbiters of cellular response to DNA damage, the DDR plays an  
18 obvious yet poorly understood role in the determining how host cells are affected by  
19 TE activity. Using *P*-element hybrid dysgenesis as a model, our observations reveal  
20 that DDR components Chk2 and p53 are determinant of cell-fate in the presence of  
21 unregulated transposition. Our observations further highlight the unique role of p53  
22 in germline stem cells in conferring tolerance of transpositional activity, by  
23 preserving GSCs in the face of increased DNA damage.



1           The molecular function of p53 protein in *P*-element dysgenic germlines  
2 remains unclear. However, p53 was recently revealed to act as a negative regulator  
3 of retrotransposon activity in the female germline (Tiwari et al., 2017; Wylie et al.,  
4 2016). Interestingly, TE derepression in *p53* mutants depends on the meiotic  
5 nuclease *spo11*, suggesting that retrotransposon activation depends on the  
6 production of double-stranded breaks (Wylie et al., 2016). *P*-element transposition  
7 in GSCs and CBs may therefore act as a trigger, which, in the absence of *p53* releases  
8 regulation of retrotransposons, causing enhanced DNA damage and germline loss.

9

## 10 **ACKNOWLEDGEMENTS**

11

12 We are grateful to John Abrams, Haifan Lin, Richard Meisel, Jeff Sekelsky and  
13 William Theurkauf for providing mutant and transgenic *Drosophila*. We are also  
14 grateful to members of the Kelleher and Meisel laboratories for helpful discussion.  
15 Sadia Tasnim was supported by a Summer Undergraduate Research Fellowship  
16 from the University of Houston. Erin Kelleher was supported by NSF DEB  
17 #1457800.

18

19

## 20 **REFERENCES**

21

22 Abdu, U., Brodsky, M., Sch?pbach, T., 2002. Activation of a Meiotic Checkpoint during  
23 *Drosophila* Oogenesis Regulates the Translation of Gurken through Chk2/Mnk.  
24 *Curr. Biol.* 12, 1645–1651. doi:10.1016/S0960-9822(02)01165-X  
25 Bellen, H.J., Levis, R.W., Liao, G., He, Y., Carlson, J.W., Tsang, G., Evans-Holm, M.,  
26 Hiesinger, P.R., Schulze, K.L., Rubin, G.M., Hoskins, R.A., Spradling, A.C., 2004.  
27 The BDGP gene disruption project: single transposon insertions associated with  
28 40% of *Drosophila* genes. *Genetics* 167, 761–81.  
29 doi:10.1534/genetics.104.026427

- 1 Bingham, P.M., Kidwell, M.G., Rubin, G.M., 1982. The molecular basis of P-M hybrid  
2 dysgenesis: the role of the P element, a P-strain-specific transposon family. *Cell*  
3 29, 995–1004.
- 4 Brodsky, M.H., Weinert, B.T., Tsang, G., Rong, Y.S., McGinnis, N.M., Golic, K.G., Rio,  
5 D.C., Rubin, G.M., 2004. *Drosophila melanogaster* MNK/Chk2 and p53 regulate  
6 multiple DNA repair and apoptotic pathways following DNA damage. *Mol. Cell.*  
7 *Biol.* 24, 1219–31. doi:10.1128/MCB.24.3.1219-1231.2004
- 8 Bucheton, A., Paro, R., Sang, H.M., Pelisson, A., Finnegan, D.J., 1984. The molecular  
9 basis of I-R hybrid dysgenesis in *Drosophila melanogaster*: identification,  
10 cloning, and properties of the I factor. *Cell* 38, 153–63.
- 11 Castañeda, J., Genzor, P., Bortvin, A., 2011. piRNAs, transposon silencing, and  
12 germline genome integrity. *Mutat. Res.* 714, 95–104.
- 13 Cox, D.N., Chao, A., Lin, H., 2000. piwi encodes a nucleoplasmic factor whose activity  
14 modulates the number and division rate of germline stem cells. *Development*  
15 127, 503–14.
- 16 Dorogova, N. V., Bolobolova, E.U., Zakharenko, L.P., 2017. Cellular aspects of gonadal  
17 atrophy in *Drosophila* P-M hybrid dysgenesis. *Dev. Biol.* 424, 105–112.  
18 doi:10.1016/j.ydbio.2017.02.020
- 19 Dupuy, A.J., Fritz, S., Largaespada, D.A., 2001. Transposition and gene disruption in  
20 the male germline of the mouse. *Genesis* 30, 82–8.
- 21 Engels, W.R., Johnson-Schlitz, D.M., Eggleston, W.B., Sved, J., 1990. High-frequency P  
22 element loss in *Drosophila* is homolog dependent. *Cell* 62, 515–25.
- 23 Evgen'ev, M.B., Zelentsova, H., Shostak, N., Kozitsina, M., Barskyi, V., Lankenau, D.H.,  
24 Corces, V.G., 1997. Penelope, a new family of transposable elements and its  
25 possible role in hybrid dysgenesis in *Drosophila virilis*. *Proc. Natl. Acad. Sci. U.*  
26 *S. A.* 94, 196–201.
- 27 Green, D.R., Kroemer, G., 2009. Cytoplasmic functions of the tumour suppressor p53.  
28 *Nature* 458, 1127–1130. doi:10.1038/nature07986
- 29 Hassel, C., Zhang, B., Dixon, M., Calvi, B.R., 2013. Induction of endocycles represses  
30 apoptosis independently of differentiation and predisposes cells to genome  
31 instability. *Development* 141.
- 32 Hedges, D.J., Deininger, P.L., 2007. Inviting instability: Transposable elements,  
33 double-strand breaks, and the maintenance of genome integrity. *Mutat. Res.*  
34 616, 46–59. doi:10.1016/j.mrfmmm.2006.11.021
- 35 Hill, T., Schlötterer, C., Betancourt, A.J., 2016. Hybrid Dysgenesis in *Drosophila*  
36 *simulans* Associated with a Rapid Invasion of the P-Element. *PLoS Genet.* 12,  
37 e1005920. doi:10.1371/journal.pgen.1005920
- 38 Josefsson, C., Dilkes, B., Comai, L., 2006. Parent-dependent loss of gene silencing  
39 during interspecies hybridization. *Curr. Biol.* 16, 1322–8.  
40 doi:10.1016/j.cub.2006.05.045
- 41 Kasthuber, E.R., Lowe, S.W., 2017. Putting p53 in Context. *Cell* 170, 1062–1078.  
42 doi:10.1016/j.cell.2017.08.028
- 43 Kelleher, E.S., 2016. Reexamining the P-Element Invasion of *Drosophila*  
44 *melanogaster* Through the Lens of piRNA Silencing. *Genetics* 203, 1513–31.  
45 doi:10.1534/genetics.115.184119
- 46 Khurana, J.S., Wang, J., Xu, J., Koppetsch, B.S., Thomson, T.C., Nowosielska, A., Li, C.,

- 1 Zamore, P.D., Weng, Z., Theurkauf, W.E., 2011. Adaptation to P element  
2 transposon invasion in *Drosophila melanogaster*. *Cell* 147, 1551–63.  
3 doi:10.1016/j.cell.2011.11.042
- 4 Kidwell, M.G., Kidwell, J.F., Sved, J.A., 1977. Hybrid Dysgenesis in *Drosophila*  
5 *melanogaster*: A Syndrome of Aberrant Traits Including Mutation, Sterility and  
6 Male Recombination. *Genetics* 86, 813–33.
- 7 Koundakjian, E.J., Cowan, D.M., Hardy, R.W., Becker, A.H., 2004. The Zuker collection:  
8 a resource for the analysis of autosomal gene function in *Drosophila*  
9 *melanogaster*. *Genetics* 167, 203–6.
- 10 LaRocque, J.R., Jaklevic, B., Su, T.T., Sekelsky, J., 2007. *Drosophila* ATR in double-  
11 strand break repair. *Genetics* 175, 1023–33. doi:10.1534/genetics.106.067330
- 12 Lu, W.-J., Chapo, J., Roig, I., Abrams, J.M., 2010. Meiotic recombination provokes  
13 functional activation of the p53 regulatory network. *Science* 328, 1278–81.  
14 doi:10.1126/science.1185640
- 15 Ma, X., Zhu, X., Han, Y., Story, B., Do, T., Song, X., Wang, S., Zhang, Y., Blanchette, M.,  
16 Gogol, M., Hall, K., Peak, A., Anoja, P., Xie, T., 2017. Aubergine Controls Germline  
17 Stem Cell Self-Renewal and Progeny Differentiation via Distinct Mechanisms.  
18 *Dev. Cell* 41, 157–169.e5. doi:10.1016/j.devcel.2017.03.023
- 19 Malone, C.D., Lehmann, R., Teixeira, F.K., 2015. The cellular basis of hybrid  
20 dysgenesis and Stellate regulation in *Drosophila*. *Curr. Opin. Genet. Dev.* 34, 88–  
21 94. doi:10.1016/j.gde.2015.09.003
- 22 McKearin, D., Ohlstein, B., 1995. A role for the *Drosophila* bag-of-marbles protein in  
23 the differentiation of cystoblasts from germline stem cells. *Development* 121,  
24 2937–47.
- 25 Orsi, G.A., Joyce, E.F., Couble, P., McKim, K.S., Loppin, B., 2010. *Drosophila* I-R hybrid  
26 dysgenesis is associated with catastrophic meiosis and abnormal zygote  
27 formation. *J. Cell Sci.* 123, 3515–24.
- 28 Rong, Y.S., Titen, S.W., Xie, H.B., Golic, M.M., Bastiani, M., Bandyopadhyay, P., Olivera,  
29 B.M., Brodsky, M., Rubin, G.M., Golic, K.G., 2002. Targeted mutagenesis by  
30 homologous recombination in *D. melanogaster*. *Genes Dev.* 16, 1568–81.  
31 doi:10.1101/gad.986602
- 32 Rørth, P., 1998. Gal4 in the *Drosophila* female germline. *Mech. Dev.* 78, 113–8.
- 33 Rørth, P., 1996. A modular misexpression screen in *Drosophila* detecting tissue-  
34 specific phenotypes. *Proc. Natl. Acad. Sci. U. S. A.* 93, 12418–22.
- 35 Rubin, G.M., Kidwell, M.G., Bingham, P.M., 1982. The molecular basis of P-M hybrid  
36 dysgenesis: the nature of induced mutations. *Cell* 29, 987–94.
- 37 Schaefer, R.E., Kidwell, M.G., Fausto-Sterling, A., 1979. Hybrid Dysgenesis in  
38 *Drosophila melanogaster*: Morphological and Cytological Studies of Ovarian  
39 Dysgenesis. *Genetics* 92, 1141–52.
- 40 Shim, H.J., Lee, E.-M., Nguyen, L.D., Shim, J., Song, Y.-H., 2014. High-dose irradiation  
41 induces cell cycle arrest, apoptosis, and developmental defects during  
42 *Drosophila* oogenesis. *PLoS One* 9, e89009. doi:10.1371/journal.pone.0089009
- 43 Spradling, A., 1993. Developmental genetics of oogenesis. *Dev. Drosoph.*  
44 *melanogaster*.
- 45 Spradling, A.C., Stern, D., Beaton, A., Rhem, E.J., Laverty, T., Mozden, N., Misra, S.,  
46 Rubin, G.M., 1999. The Berkeley *Drosophila* Genome Project gene disruption

- 1 project: Single P-element insertions mutating 25% of vital *Drosophila* genes.  
2 Genetics 153, 135–77.
- 3 Srivastav, S.P., Kelleher, E.S., 2017. Paternal Induction of Hybrid Dysgenesis in  
4 *Drosophila melanogaster* Is Weakly Correlated with Both *P*-Element and *hobo*  
5 Element Dosage. *Genes* 8, 117. doi:10.1177/040634.  
6 doi:10.1534/g3.117.040634
- 7 Tiwari, B., Kurtz, P., Jones, A., Wylie, A., Amtruda, J., Boggupalli, D.P., Gonsalvez, G.B.,  
8 Abrams, J., 2017. Retrotransposons mimic germ plasm determinants to  
9 promote transgenerational inheritance. *Curr. Biol.*
- 10 Wylie, A., Jones, A.E., D’Brot, A., Lu, W.-J., Kurtz, P., Moran, J. V., Rakheja, D., Chen, K.S.,  
11 Hammer, R.E., Comerford, S.A., Amatruda, J.F., Abrams, J.M., 2016. p53 genes  
12 function to restrain mobile elements. *Genes Dev.* 30, 64–77.  
13 doi:10.1101/gad.266098.115
- 14 Wylie, A., Lu, W.-J., D’Brot, A., Buszczak, M., Abrams, J.M., 2014. p53 activity is  
15 selectively licensed in the *Drosophila* stem cell compartment. *Elife* 3, e01530.  
16 doi:10.7554/eLife.01530
- 17 Yannopoulos, G., Stamatis, N., Monastirioti, M., Hatzopoulos, P., Louis, C., 1987. *hobo*  
18 is responsible for the induction of hybrid dysgenesis by strains of *Drosophila*  
19 *melanogaster* bearing the male recombination factor 23.5MRF. *Cell* 49, 487–95.
- 20 Zaccai, M., Lipshitz, H.D., 1996. Role of Adducin-like (*hu-li tai shao*) mRNA and  
21 protein localization in regulating cytoskeletal structure and function  
22 during *Drosophila* oogenesis and early embryogenesis. *Dev. Genet.* 19, 249–257.  
23 doi:10.1002/(SICI)1520-6408(1996)19:3<249::AID-DVG8>3.0.CO;2-9  
24
